# Supplementary material
Source: PubMed Central journal article supplement (PMC4576047)
Supplement: AAC.00944-15_zac010154385so1.pdf [file AAC.00944-15_zac010154385so1.pdf]

**Supplementary Table 1.** Broth microdilution antimicrobial MIC values obtained for *S. Corvallis* 12-1738 :

|                                                    | MICs ( $\mu\text{g/ml}$ )   |                                       |
|----------------------------------------------------|-----------------------------|---------------------------------------|
|                                                    | <i>S. Corvallis</i> 12-1738 | <i>E. coli</i> T3 <sub>-12-1738</sub> |
| <b>Panel 1: EUVSEC Plate<sup>1</sup></b>           |                             |                                       |
| Ampicillin                                         | >64                         | >64                                   |
| Azithromycin                                       | >64                         | >64                                   |
| Cefotaxime                                         | >4                          | >4                                    |
| Ceftazidime                                        | >8                          | >8                                    |
| Chloramphenicol                                    | 128                         | >128                                  |
| Ciprofloxacin                                      | 0,5                         | 0,03                                  |
| Colistin                                           | $\leq 1$                    | $\leq 1$                              |
| Gentamicin                                         | $\leq 0.5$                  | 1                                     |
| Meropenem                                          | 0,5                         | 0,5                                   |
| Nalidixic acid                                     | 16                          | $\leq 4$                              |
| Sulphamethoxazole                                  | >1024                       | >1024                                 |
| Tetracycline                                       | 64                          | 32                                    |
| Tigecycline                                        | 0,5                         | $\leq 0,25$                           |
| Trimethoprim                                       | >32                         | >32                                   |
| <b>Panel 2: EUVSEC2 Plate<sup>1</sup></b>          |                             |                                       |
| Cefepime                                           | 16                          | 8                                     |
| Cefotaxime                                         | >64                         | >64                                   |
| Cefotaxime/ clavulanic acid                        | >64                         | 64                                    |
| Cefoxitin                                          | >64                         | >64                                   |
| Ceftazidime                                        | >128                        | >128                                  |
| Ceftazidime/ clavulanic acid                       | >128                        | >128                                  |
| Ertapenem                                          | 1                           | 1                                     |
| Imipenem                                           | 2                           | 2                                     |
| Meropenem                                          | 1                           | 0,5                                   |
| Temocillin                                         | 64                          | 32                                    |
| <b>Panel 3. VITEK-II Card AST-N248<sup>2</sup></b> |                             |                                       |
| Fosfomicin                                         | >128                        | >128                                  |
| Amikacin                                           | 16                          | 16                                    |

<sup>1</sup>: Panels according to the European Commission Legislation, Implementing Decision 2013/652/EU (<http://>

and its transconjugant *E. coli* T3<sub>-12-1738</sub>.

[/eur-lex.europa.eu/legal-content/EN/TXT/?uri=CELEX:32013D0652](http://eur-lex.europa.eu/legal-content/EN/TXT/?uri=CELEX:32013D0652))
